# Supplementary material
Source: Springer Nature journal article supplement (https://www.springermedizin.de/resource/supplementary/13643_2012_43_MOESM1_ESM.pdf/9681308)
Supplement: MOESM1 [file 9681308]

**Philosophy:**

**Idealist**

**Realist**

**Relation to theory:**

**Generate**

**Explore**

**Test**

**Approach to synthesis:**

**Configuring**

**Aggregating**

**Methods:**

**Iterative**

**A priori**

**Quality assessment:**

Theoreticalsearch

Valuestudy  
contributions

'Exhaustivesearch

Avoidbias

**Product:**

Emergentconcepts

Magnitude & precision

**Review use:**

**Enlightenment**

**Instrumental**
